# Supplementary material for: Genomics of Human Respiratory Syncytial Virus Vaccine Attenuation
Source: bioRxiv or medRxiv preprint supplement (doi:10.1101/862185), 2020-10-20
Supplement: Supplementary file [file media-1.pdf]

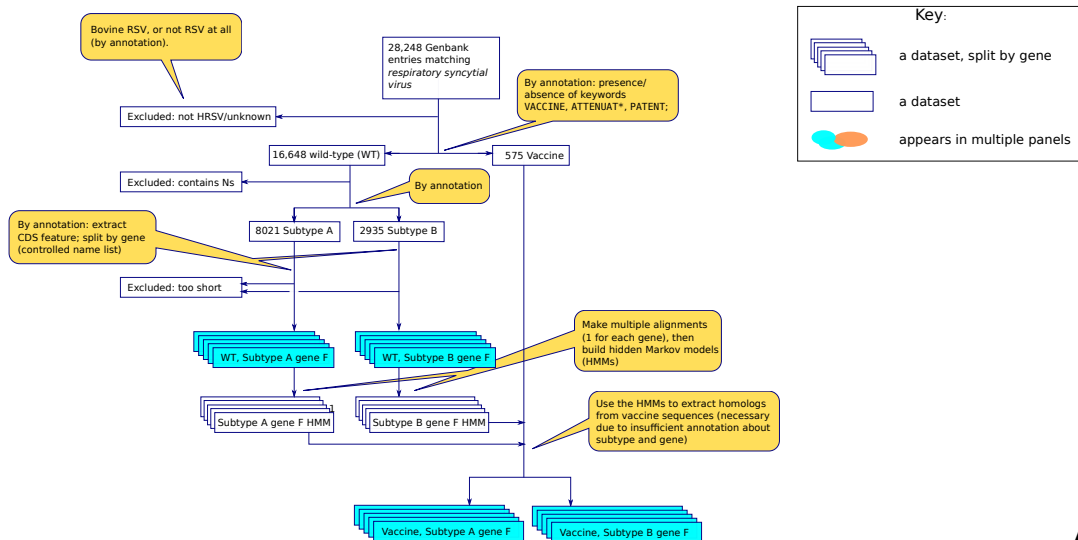

A

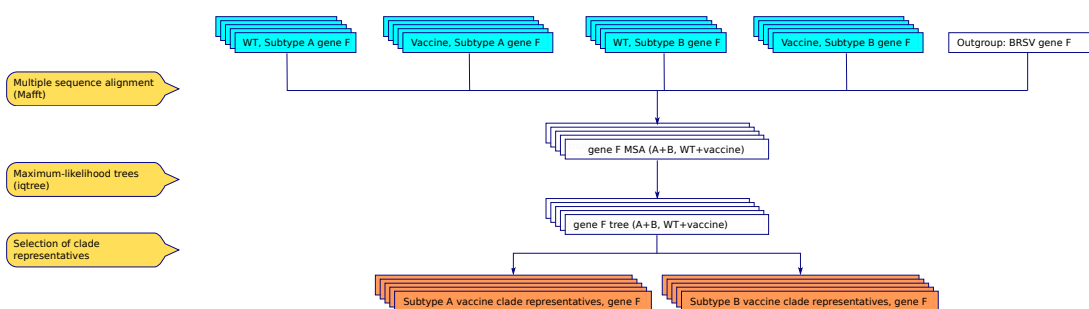

B

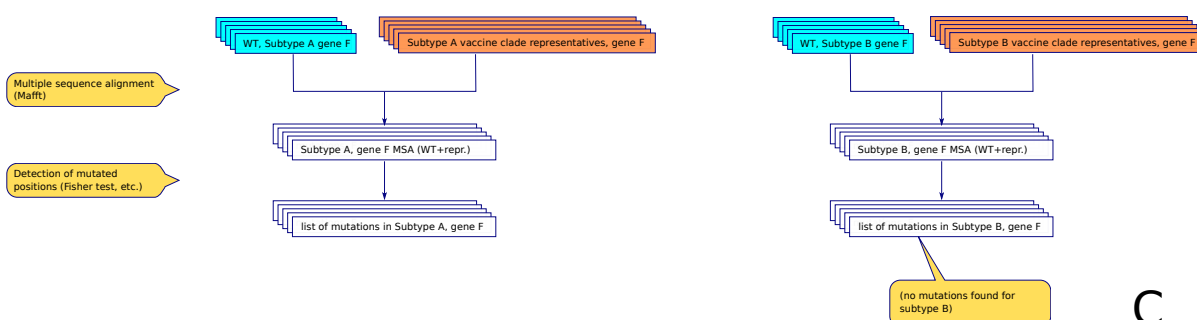

C

### Data Flow:

**A:** Extracting and sorting sequences by gene, subtype and origin (WT/vaccine). Input is the set of GenBank entries pertaining to RSV. Outputs are sets of sequences, one each for each gene/subtype/origin combination (cyan). Classification is by annotation (WT) or by sequence similarity to WT (vaccines).

**B:** Building phylogenies and extracting clade representatives. Inputs are the sequence sets from step **A**, outputs are sets of sequences representative of each clade (orange). See text for rationale.

**C:** Finding mutated positions. Inputs are results from steps **A** and **B**, outputs are lists of positions which have significantly different major/minor allele frequencies among vaccines by comparison with WT sequences. Significance is measured by Fisher's exact test.
